# Supplementary material for: Continuous 3D-nanopatterned Ni–Mo solid solution as a free-standing electrocatalyst for the hydrogen evolution reaction in alkaline medium
Source: Royal Society of Chemistry journal article supplement (doi:10.1039/d0ta12466d), 2021-01-01
Supplement: d0ta12466d1.pdf [file d0ta12466d1.pdf]

## Electronic Supplementary Information (ESI)

### Continuous 3D-Nanopatterned Ni-Mo Solid Solution as Free-Standing Electrocatalyst for the Hydrogen Evolution Reaction in Alkaline Medium

Kisun Kim,<sup>a</sup> Anand P. Tiwari,<sup>\*a</sup> Gayea Hyun,<sup>a</sup> Yeoheung Yoon,<sup>b</sup> Heeyoung Kim,<sup>c,d</sup> Jeong Young Park,<sup>c,d</sup> Ki-Seok An<sup>\*b</sup> and Seokwoo Jeon<sup>\*a</sup>

<sup>a</sup>Department of Materials Science and Engineering, Advanced Battery Centre, KAIST Institute for the Nanocentury, KAIST, Daejeon 34141, Republic of Korea

<sup>b</sup>Thin Film Materials Research Center, Korea Research Institute of Chemical Technology, Yuseong Post Office Box 107, Daejeon 34114, Republic of Korea

<sup>c</sup>Department of Chemistry, Korea Advanced Institute of Science and Technology (KAIST), Daejeon 34141, Republic of Korea.

<sup>d</sup>Center for Nanomaterials and Chemical Reactions, Institute for Basic Science (IBS), Daejeon 34141, Republic of Korea.

In this Supplementary Information, we provide the following experimental, data, and description, which support to our main text:

**Fig. S1:** Schematic illustration of the fabrication procedure of the 3D Ni-Mo solid solution.

**Fig. S2:** TEM images of the 3D Ni-Mo solid solution.

**Fig. S3:** Electrochemical performances. a) Linear sweep voltammetry (LSV) curves of the 2D Ni-Mo with different composition. b) Tafel plots of the 2D Ni-Mo with different composition. c) Nyquist plots for the 2D Ni-Mo with different composition. d) Cyclic voltammetry (CV) curves of the 2D Ni-Mo. All the test were performed in 1 M KOH.

**Fig. S4.** Linear sweep voltammetry (LSV) curves of the 3D nanopatterned Ni-Mo with different thickness at scan rate of 2 mV/s.

**Fig. S5.** Faradaic efficiency measurement of 7  $\mu\text{m}$  3D Ni-Mo showing the theoretically calculated and experimentally measured  $\text{H}_2$  gas with time.

**Fig. S6.** Linear sweep voltammetry (LSV) curves of the (a) 4  $\mu\text{m}$  3D-nanopatterned Ni-Mo, and (b) 10  $\mu\text{m}$  3D-nanopatterned Ni-Mo for activation.

**Fig. S7.** OER polarization curves of 7  $\mu\text{m}$  3D Ni-Mo with a scan rate of 10  $\text{mVs}^{-1}$  in 1 M KOH.

**Fig. S8.** Overall water-splitting performance test of the 3D Ni-Mo with  $\text{IrO}_2$  conducted in 1.0 M KOH. Polarization curve for overall water splitting at a scan rate of 5  $\text{mVs}^{-1}$ .

## Experimental procedures

### *Preparation of the 3D SU-8 template*

A metal seed layer of Au (50 nm) and Cr (5 nm) was deposited on a SiO<sub>2</sub>/Si substrate using electron-beam (e-beam) evaporator (SNTEK). The Au/Cr-deposited substrate was treated by an air plasma (CUTEMP, Femtoscience) for 2 min (50 sccm, 40 mTorr, 60 W). A 10 μm thickness of epoxy-based photopolymer film (SU-8 10, Microchem) was spin coated on the plasma-treated substrate and soft-baked on a hotplate at 95 °C for 10 min. After that a polydimethylsiloxane (PDMS) (Sylgard 184, Dow Corning) phase mask which is consisted of a square array of holes with a diameter of 480 nm, a depth of 420 nm, and a periodicity of 600 nm was placed on the photopolymer-coated substrate. The collimated 355 nm laser (Nd:YAG, Advanced Optowave) was went through the phase mask with 10.3 mJ/cm<sup>2</sup> of exposure dose. After that, the substrate was post-baked on the hotplate at 65 °C for 6 min. Finally, unexposed regions in the photopolymer were selectively etched by developing solution (SU-8 developer, Microchem) at room temperature for 30 min and rinsed by ethanol for 30 min.<sup>1-5</sup>

### *Preparation of the 3D Ni-Mo*

A 3D Ni-Mo solid solution was deposited on the 3D SU-8 template by conventional potentiostat (VersaSTATE3, Principle-applied Research).<sup>6-9</sup> The electrodeposition was consisted of a three electrodes system: the seed layer under the 3D SU-8 template as a working electrode, a Pt plate as a counter electrode, and an Ag/AgCl electrode as a reference. The electrolyte was mixture of 0.3 M NiSO<sub>4</sub>·6H<sub>2</sub>O, 0.2 M Na<sub>2</sub>MoO<sub>4</sub>·2H<sub>2</sub>O, and 0.3 M Na<sub>3</sub>C<sub>6</sub>H<sub>5</sub>O<sub>7</sub>·2H<sub>2</sub>O in 90 mL of DI water. The pH value was adjusted to 10.5 using ammonia.<sup>10</sup> The Ni-Mo solid solution was alternatively deposited in the 3D SU-8 template with different cycles (each cycle is consisted of 5 s at -0.5 V vs. NHE and 5 s at 0 mA/cm<sup>2</sup>). After the deposition of Ni-Mo, the 3D SU-8 template was etched by radical etching system (STP Compat, Muegge) and rinsed by ethanol.

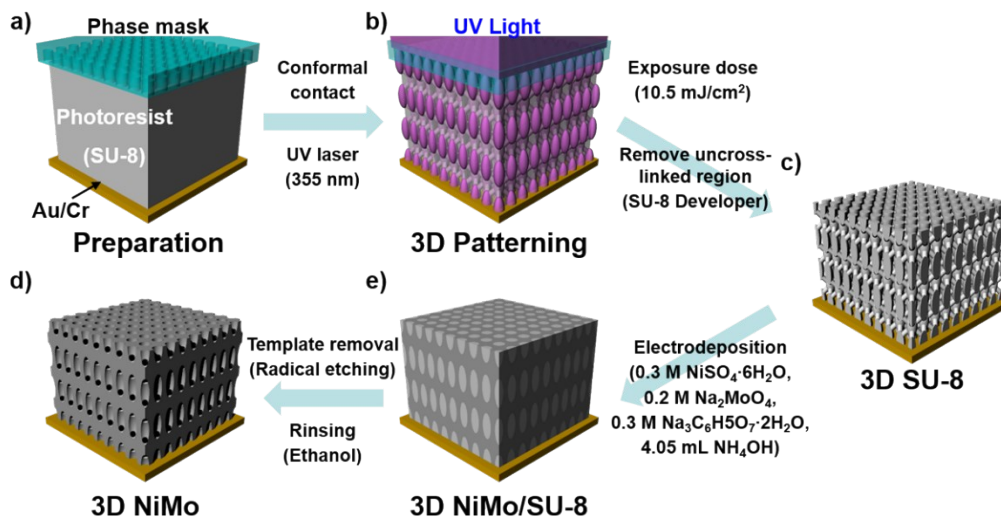

**Fig. S1.** Schematic illustration of the fabrication procedure of the 3D Ni-Mo solid solution.

### *Characterization*

The microstructure analysis was conducted by field emission scanning electron microscopy (FE-SEM) (S-4800, Hitachi) and transmission electron microscope (TEM). X-ray diffraction (XRD) of the samples were performed with Cu  $K\alpha$  radiation (Ultima IV, Rigaku). Chemical states of the elements in the samples are confirmed by X-ray photoemission spectroscopy (XPS) (Thermo VG Scientific, K-alpha).

### *Electrochemical analysis*

Electrochemical analyses were conducted by commercial electrochemical workstation (VersaSTAT3, Principle-applied Research). The electrochemical performances were carried out via three electrode system: as synthesized samples as a working electrodes, Pt wire as a counter electrodes, and the Hg/HgO electrodes as a reference. All electrochemical experiments was conducted in alkaline solution (1 M KOH). The evolved  $H_2$  gas was measured using online gas chromatography system (DS Science) with thermal conductivity detector and MS-5A column. Argon gas was used as a carrier gas. The aliquots from the electrochemical cell were injected into the GC system every 2.7 mins by auto-sampling. The GC was calibrated with known concentrations of  $H_2$  standard gas in Argon and the moles of

H<sub>2</sub> were calculated using the H<sub>2</sub> peak area. The Faradic efficiency was calculated from the total charge passed through the cell at corresponding time intervals using Faraday's law, equation

$$\text{Faradic Efficiency} = \frac{nF \times m}{Q}$$

Where F = Faraday's constant (96,485.33 As mol<sup>-1</sup>), n = 2 for HER, m = moles of gas produced and Q = amount of charge passed.

### **Description to calculate turn over frequency (TOF) for H<sub>2</sub> of as-prepared nano-patterns**

The structural data of Ni from the ICDD-PDF-4 database is used.

Density of NiMo = 6.3 g·cm<sup>-3</sup>. Average size of NiMo nanoparticle (determined from the Scherrer equation) = 14 nm. The shapes of the nanoparticles are approximated to spherical.

Total volume of NiMo particles present on the electrode

$$= (1 \times 10^{-5}) / 6.3 = 1.6 \times 10^{-6} \text{ cm}^3$$

Total number of NiMo nanoparticles present on the electrode

$$\begin{aligned} &= (1.6 \times 10^{-6}) / [(4/3) \cdot (\pi) \cdot (r^3)] \\ &= (1.6 \times 10^{-6}) / [4.18 \times (7 \times 10^{-7})^3] \\ &= 1.17 \times 10^{12} \text{ particles} \end{aligned}$$

Surface area of one NiMo nanoparticle

$$\begin{aligned} &= (4) \cdot (\pi) \cdot (r^2) \\ &= 0.6 \times 10^{-15} \text{ m}^2 \end{aligned}$$

Total surface area of all NiMo the nanoparticles present

$$= (1.17 \times 10^{12}) \times (7.9 \times 10^{-15}) = 9.2 \times 10^{-4} \text{ m}^2$$

The area of per unit cells of NiMo = 7.4 × 10<sup>-19</sup> m<sup>2</sup>

There are six Ni atoms in this cell.

Total number of Ni atoms presents

$$\begin{aligned} &= [6 / (7.4 \times 10^{-19})] \times (9.2 \times 10^{-4}) \\ &= 7.5 \times 10^{15} \text{ atoms} \end{aligned}$$

After dividing effective atoms by total number of particles, we can get turn over frequency at particular potentials.

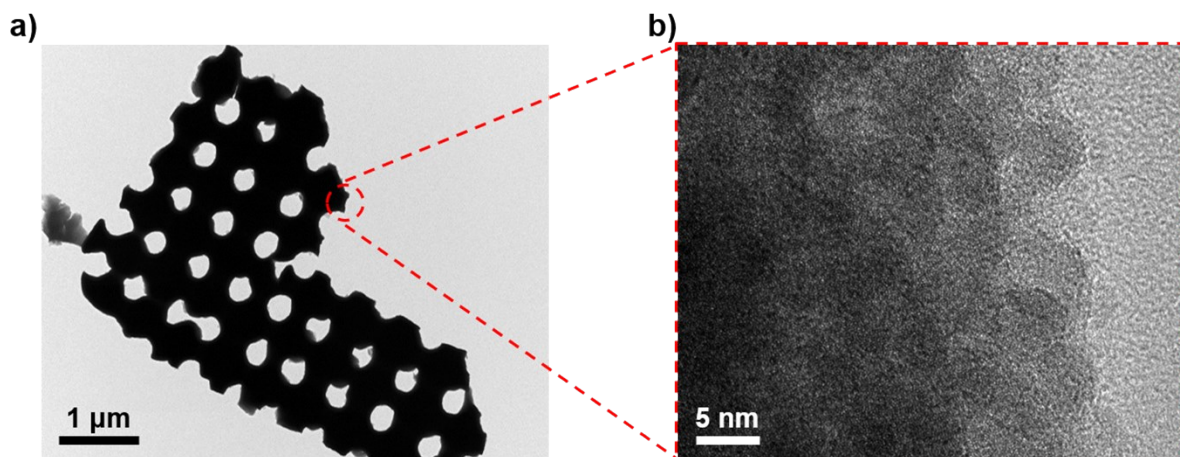

Fig. S2. TEM image of 3D Ni-Mo.

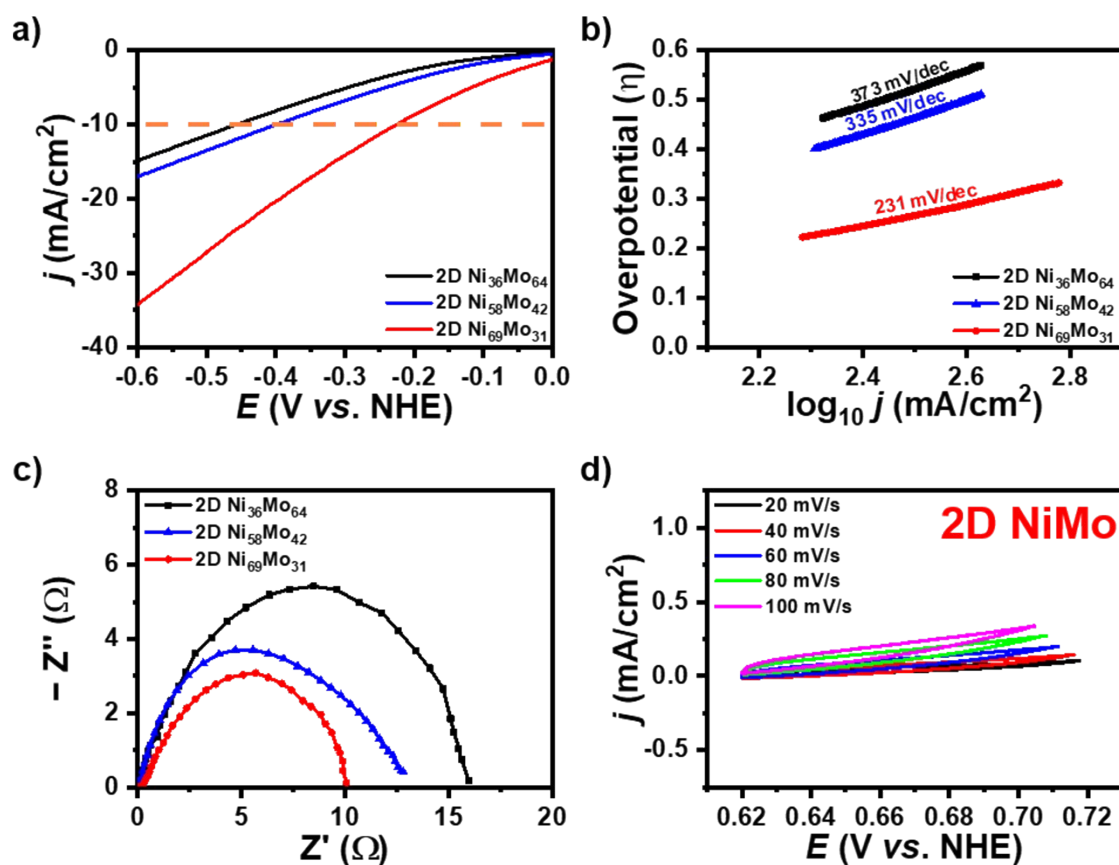

Fig. S3. Electrochemical performances. a) Linear sweep voltammetry (LSV) curves of the 2D Ni-Mo with different composition. b) Tafel plots of the 2D Ni-Mo with different composition. c) Nyquist plots for the 2D Ni-

Mo with different composition. d) Cyclic voltammetry (CV) curves of the 2D Ni-Mo. All the test were performed in 1 M KOH.

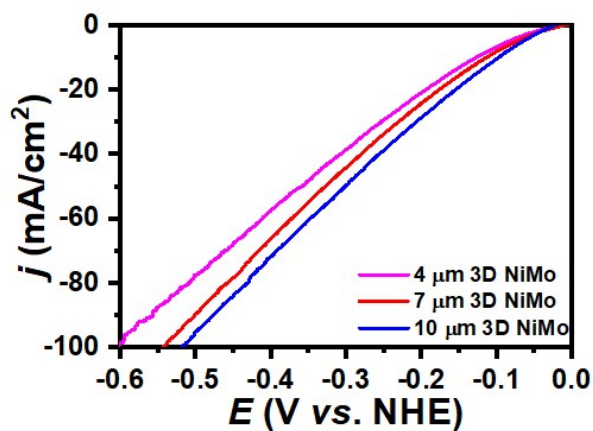

**Fig. S4.** Linear sweep voltammetry (LSV) curves of the 3D nanopatterned Ni-Mo with different thickness at scan rate of 2 mV/s.

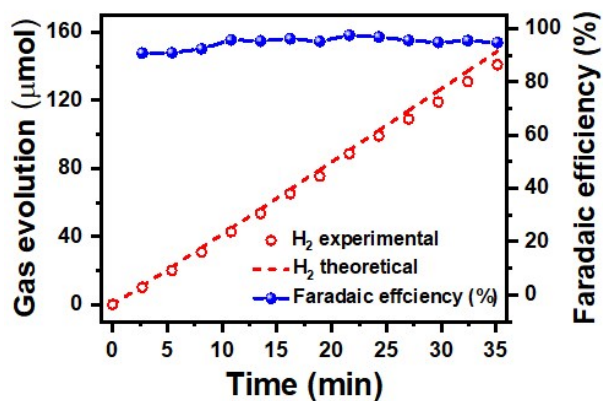

**Fig. S5.** Faradaic efficiency measurement of 7  $\mu\text{m}$  3D Ni-Mo showing the theoretically calculated and experimentally measured H<sub>2</sub> gas with time.

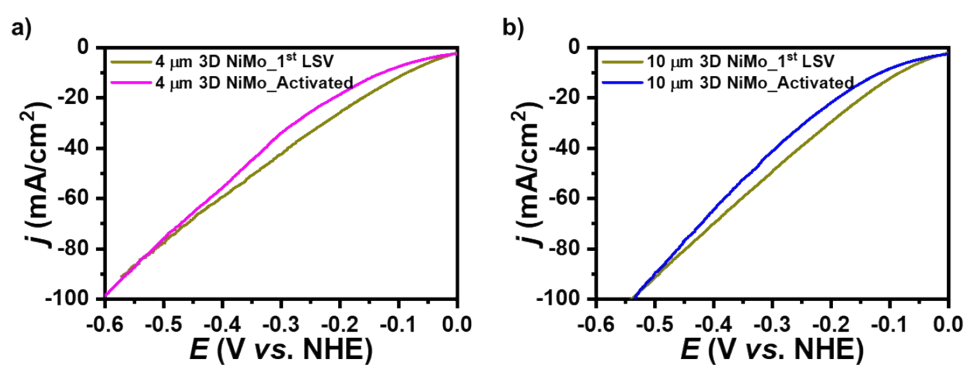

**Fig. S6.** Linear sweep voltammetry (LSV) curves of the (a) 4  $\mu\text{m}$  3D-nanopatterned Ni-Mo, and (b) 10  $\mu\text{m}$  3D-nanopatterned Ni-Mo for activation.

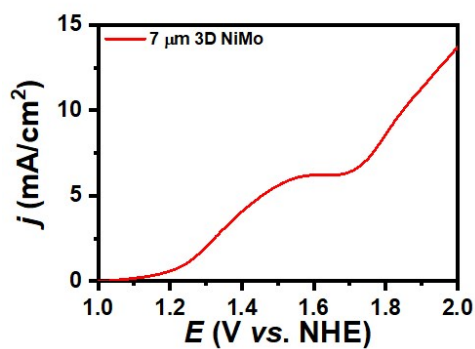

**Fig. S7.** OER polarization curves of 7  $\mu\text{m}$  3D NiMo with a scan rate of 10  $\text{mVs}^{-1}$  in 1 M KOH.

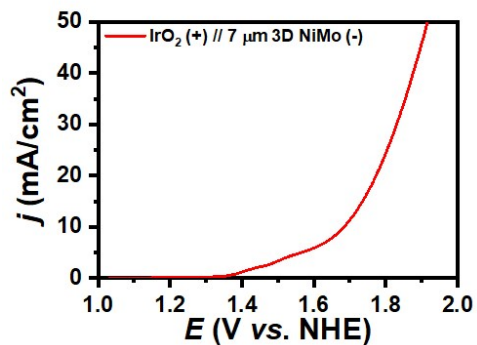

**Fig. S8.** Overall water-splitting performance test of the 3D Ni-Mo with  $\text{IrO}_2$  conducted in 1.0 M KOH. Polarization curve for overall water splitting at a scan rate of 5  $\text{mVs}^{-1}$ .

## References

1. S. Jeon, J. -U. Park, R. Cirelli, S. Yang, C. E. Heitzman, P. V. Braun, P. J. A. Kenis and J. A. Rogers, *PNAS*, 2004, **101**, 12428-12433.
2. J. Park, S. Wang, M. Li, C. Ahn, J. K. Hyun, D. S. Kim, D. K. Kim, J. A. Rogers, Y. Huang and S. Jeon, *Nat. Commun.*, 2012, **3**, 916.
3. S. Daun, Z. Wang, L. Zhang, J. Liu and C. Li, *ACS Appl. Mater. Interfaces*, 2017, **9**, 30772-30778.
4. T. G. Novak, K. Kim and S. Jeon, *Nanoscale*, 2019, **11**, 19684-19699.
5. D. Cho, J. Park, T. Kim and S. Jeon, *J. Semicond.*, 2019, **40**, 11605.
6. G. Hyun, J. T. Song, C. Ahn, Y. Ham, D. Cho, J. Oh, S. Jeon, *PNAS*, 2020, **117**, 5680-5685.
7. K. Kim, A. P. Tiwari, G. Hyun, T. G. Novak and S. Jeon, *Int. J. Hydrogen Energy*, 2019, **44**, 28143-28150.
8. S. Kim, C. Ahn, Y. Cho, G. Hyun, S. Jeon, J. H. Park, *Nano Energy*, 2018, **54**, 184-191.
9. S. Hong, J. Park, S. G. Jeon, K. Kim, S. H. Park, H. S. Shin, B. Kim, S. Jeon and J. Y. Song, *J. Mater. Chem. C*, 2017, **5**, 8974-8980.
10. M. Wang, Z. Wang, X. Yu and Z. Guo, *Int. J. Hydrogen Energy*, 2015, **40**, 2173-2181.
